# Supplementary material
Source: Springer Nature journal article supplement (https://www.springermedizin.de/resource/supplementary/12936_2011_1921_MOESM8_ESM.pdf/9542058)

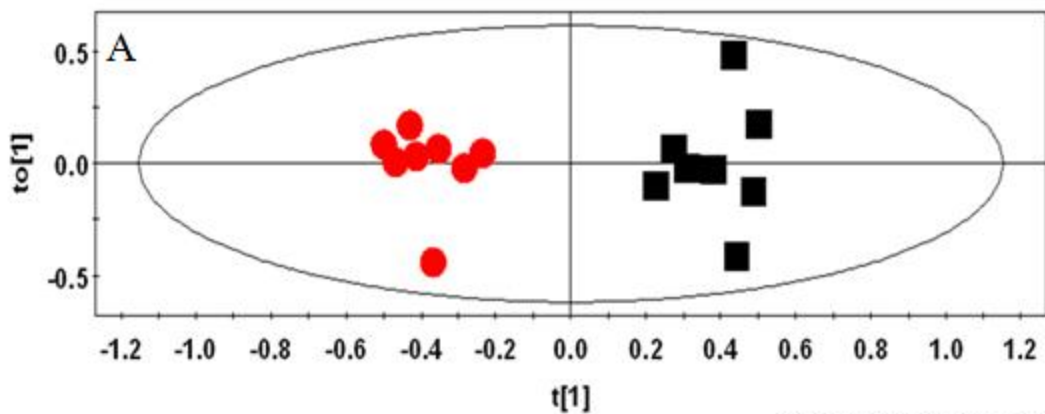

SMC/AP+12 - 2011-05-27 05:58:44 (UTC+6.5)

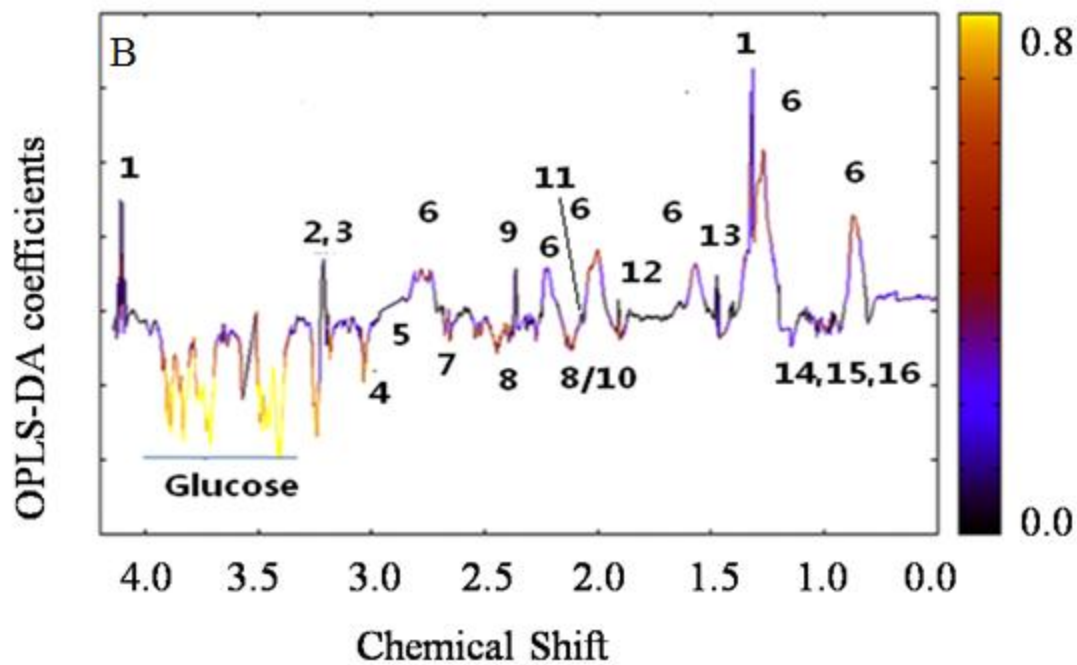

Supplement: MOESM8 [file 9542058]
